# Supplementary material for: Hydrodeoxygenation of condensed lignins followed by acid-mediated methylolation enables preparation of lignin-based wood adhesives
Source: Royal Society of Chemistry journal article supplement (doi:10.1039/d3gc03935h), 2023-11-11
Supplement: d3gc03935h1.pdf [file d3gc03935h1.pdf]

## Supplementary Materials for

# Hydrodeoxygenation of Condensed Lignins Followed by Acid-Mediated Methylation Enables Preparation of Lignin-Based Wood Adhesives

Guangxu Yang,<sup>‡a</sup> Zhenggang Gong,<sup>‡a</sup> Bei Zhou,<sup>‡b</sup> Xiaolin Luo,<sup>a</sup> Jing Liu,<sup>a</sup> Guanben Du,<sup>\*b</sup> Chengke Zhao,<sup>\*a</sup> and Li Shuai<sup>\*a</sup>

<sup>a</sup>. College of Materials Engineering, Fujian Agriculture and Forestry University, Fuzhou, 350002, China.

<sup>b</sup>. Yunnan Provincial Key Laboratory of Wood Adhesives and Glued Products, College of Materials Science and Engineering, Southwest Forestry University, Kunming, 650224, China.

<sup>‡</sup> The authors contributed equally to this work.

\* Corresponding author email: lishuai@fafu.edu.cn

|                 |    |
|-----------------|----|
| I. Tables       | 2  |
| II. Figures     | 5  |
| III. References | 12 |

## I. Tables

**Table S1.** Yields of monomers derived from hydrodeoxygenation of lignin samples that were extracted with different methods.

| Samples <sup>a</sup> | Lignin monomer yields (mol%) |     |      |     |      |       |
|----------------------|------------------------------|-----|------|-----|------|-------|
|                      | M1                           | M2  | M3   | M4  | M5   | Total |
| NL                   | 7.2                          | 2.3 | 15.3 | 2.0 | 24.3 | 51.1  |
| EL                   | 2.9                          | 1.1 | 5.7  | 0.6 | 5.7  | 16.0  |
| KL                   | 2.7                          | 0.4 | 0.9  | 0.0 | 0.0  | 4.0   |
| DL                   | 1.2                          | 0.6 | 0.7  | 0.2 | 0.0  | 2.7   |

<sup>a</sup> NL, EL, KL, and DL are abbreviations for native lignin, ethanol lignin, kraft lignin, and dioxane lignin, respectively.

**Table S2.** The contents (mol/mol) of different hydroxyl groups of lignin before/after acid-mediated methylation.

| Samples <sup>a</sup>              | Contents of hydroxyl groups (mmol/g) <sup>d</sup> |                |                 |                |                 |                  | Total phenolic OH |
|-----------------------------------|---------------------------------------------------|----------------|-----------------|----------------|-----------------|------------------|-------------------|
|                                   | Aliphatic OH                                      | Syringyl OH    |                 | Guaiacyl OH    |                 | Carboxylic group |                   |
|                                   |                                                   | C <sup>b</sup> | NC <sup>c</sup> | C <sup>b</sup> | NC <sup>c</sup> |                  |                   |
| HKL                               | 0.14                                              | 0.24           | 0.25            | 0.07           | 0.35            | 0.04             | 0.91              |
| MHKL                              | 0.29                                              | 0.3            | 0.27            | 0.1            | 0.24            | 0.07             | 0.91              |
| HEL                               | 0.34                                              | 0.46           | 0.27            | 0.04           | 0.21            | 0.01             | 0.98              |
| MHEL                              | 0.37                                              | 0.48           | 0.33            | 0.1            | 0.09            | 0.02             | 0.98              |
| HDL                               | 0.19                                              | 0.38           | 0.37            | 0.07           | 0.19            | 0.03             | 1.01              |
| MHDL                              | 0.35                                              | 0.4            | 0.4             | 0.12           | 0.09            | 0.07             | 1.01              |
| Chemical shift (ppm) <sup>1</sup> | 150.0–146.0                                       | 144.5–143.2    | 143.2–142.2     | 142.2–141.5    | 140.2–139.0     | 135.8–134.0      |                   |

<sup>a</sup> HKL/HEL/HDL are abbreviations of hydrodeoxygenated KL/EL/DL. MHKL/MHEL/ MHDL are abbreviations of HKL/HEL/HDL after acid-mediated methylation. <sup>b</sup> C, condensed; <sup>c</sup> NC, non-condensed. <sup>d</sup> The contents of hydroxyl groups in lignin before/after acid-mediated methylation were calculated on the basis of molar quantities of total phenolic OH.

**Table S3.** The contents of the vacant reactive sites on the aromatic nuclei of lignin before/after acid-mediated methylation determined by 2D HSQC NMR.

| Samp | O | S <sub>2</sub> | G <sub>2</sub> | G <sub>5</sub> |
|------|---|----------------|----------------|----------------|
| HKL  | 1 | 0.             | 0.             | 0.             |
| MHK  | 1 | 0.             | 0.             | 0.             |
| HEL  | 1 | 0.             | 0.             | 0.             |
| MHE  | 1 | 0.             | 0.             | 0.             |
| HDL  | 1 | 0.             | 0.             | 0.             |
| MHD  | 1 | 0.             | 0.             | 0.             |

**Table S4.** The contents (mol/mol) of different hydroxyl groups of MHKL at different modification time.

| Modification<br>time (h) | Contents of hydroxyl groups (mmol/g) <sup>c</sup> |                |                 |                |                 |                     | Total phenolic<br>OH |
|--------------------------|---------------------------------------------------|----------------|-----------------|----------------|-----------------|---------------------|----------------------|
|                          | Aliphatic OH                                      | Syringyl OH    |                 | Guaiacyl OH    |                 | Carboxylic<br>group |                      |
|                          |                                                   | C <sup>a</sup> | NC <sup>b</sup> | C <sup>a</sup> | NC <sup>b</sup> |                     |                      |
| 0                        | 0.14                                              | 0.24           | 0.25            | 0.07           | 0.35            | 0.04                | 0.91                 |
| 1                        | 0.15                                              | 0.28           | 0.27            | 0.07           | 0.28            | 0.03                | 0.91                 |
| 3                        | 0.18                                              | 0.3            | 0.28            | 0.09           | 0.24            | 0.05                | 0.91                 |
| 5                        | 0.29                                              | 0.3            | 0.27            | 0.1            | 0.24            | 0.07                | 0.91                 |
| 10                       | 0.31                                              | 0.33           | 0.31            | 0.11           | 0.16            | 0.1                 | 0.91                 |

<sup>a</sup> C, condensed; <sup>b</sup> NC, non-condensed. <sup>c</sup> The contents of hydroxyl groups in MHKL at different modification time were calculated on the basis of molar quantities of total phenolic OH.

**Table S5.** The contents (mmol/g) of different hydroxyl groups of lignins before/after hot-pressing.

| Samples                   | Contents of hydroxyl groups (mmol/g) <sup>c</sup> |                |                 |                |                 |      | Carboxylic<br>group |
|---------------------------|---------------------------------------------------|----------------|-----------------|----------------|-----------------|------|---------------------|
|                           | Aliphatic<br>OH                                   | Syringyl<br>OH |                 | Guaiacyl OH    |                 |      |                     |
|                           |                                                   | C <sup>a</sup> | NC <sup>b</sup> | C <sup>a</sup> | NC <sup>b</sup> |      |                     |
| MHKL                      | 1.02                                              | 1.05           | 0.92            | 0.36           | 0.84            | 0.25 |                     |
| MHEL                      | 1.24                                              | 1.41           | 1.25            | 0.34           | 0.25            | 0.07 |                     |
| MHDL                      | 0.84                                              | 0.97           | 0.97            | 0.29           | 0.23            | 0.16 |                     |
| Hot-pressed MHKL (190 °C) | 0.24                                              | 0.28           | 0.16            | 0.1            | 0.08            | 0.08 |                     |
| Hot-pressed MHEL (190 °C) | 0.45                                              | 0.44           | 0.23            | 0.15           | 0.09            | 0.02 |                     |
| Hot-pressed MHDL (190 °C) | 0.28                                              | 0.21           | 0.11            | 0.07           | 0.04            | 0.06 |                     |

<sup>a</sup> C, condensed; <sup>b</sup> NC, non-condensed. <sup>c</sup> The contents of hydroxyl groups in lignins before/after hot-pressing were calculated on the basis of mass of lignins.

**Table S6.** The contents of elements in the lignins before/after hot-pressing at the interface of wood veneers.

| Samples                   | Elements contents (wt.%) |            |            |
|---------------------------|--------------------------|------------|------------|
|                           | C1s Scan A               | C1s Scan B | C1s Scan C |
|                           | C-C/C-H                  | C-O        | O-C-O/C=O  |
| MHKL                      | 39.17                    | 36.56      | 3.41       |
| Hot-pressed MHKL (190 °C) | 43.90                    | 28.45      | 2.97       |
| MHEL                      | 33.97                    | 39.52      | 2.78       |
| Hot-pressed MHEL (190 °C) | 57.02                    | 21.05      | 1.51       |
| MHDL                      | 43.20                    | 34.39      | 2.98       |
| Hot-pressed MHDL (190 °C) | 52.27                    | 23.63      | 2.63       |

## II. Figures

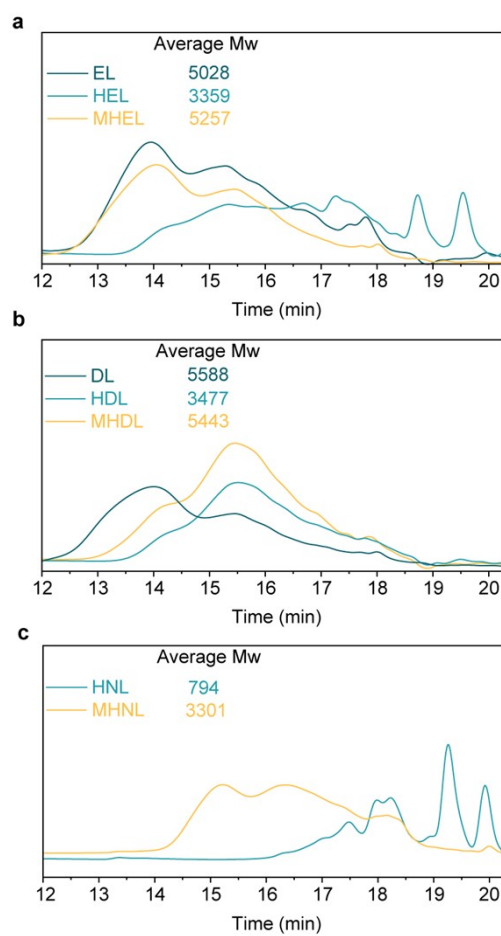

**Figure S1.** Molecular weights of lignins before/after hydrodeoxygenation and acid-mediated methylation. (a) Ethanol lignin. (b) Dioxane lignin. (c) Native lignin in eucalyptus wood particles.

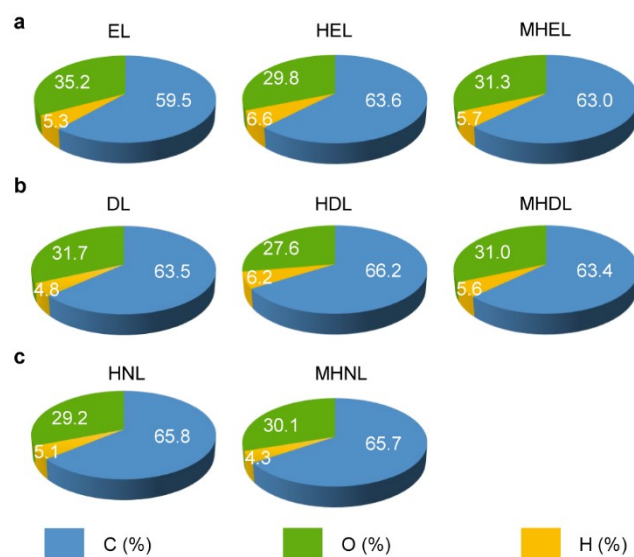

**Figure S2.** Elemental contents of lignins before/after hydrodeoxygenation and acid-mediated methylation. (a) Ethanol lignin. (b) Dioxane lignin. (c) Native lignin in eucalyptus wood particles.

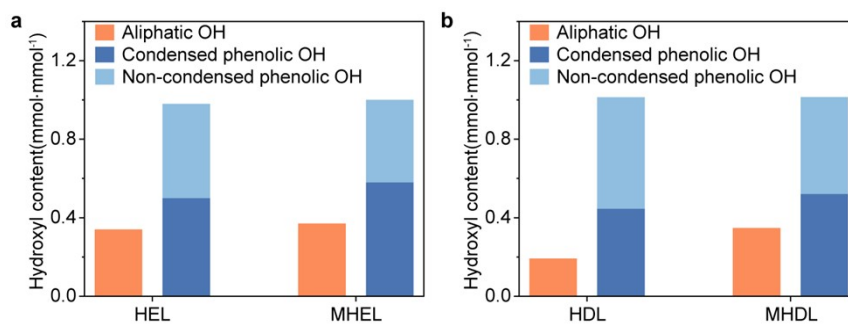

**Figure S3.** Hydroxyl contents of hydrodeoxygenated lignins before/after acid-mediated methylation. (a) Hydrodeoxygenated ethanol lignin. (b) Hydrodeoxygenated dioxane lignin.

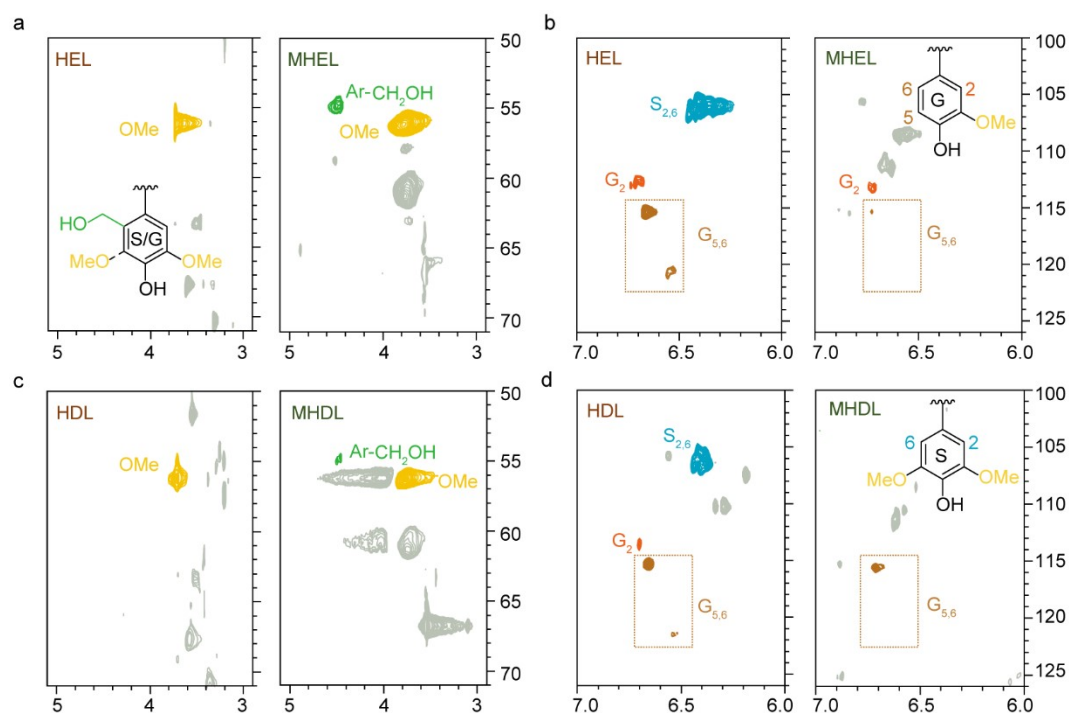

**Figure S4.** 2D HSQC NMR characterization of lignin before and after modification. (a) Partial side-chain regions and (b) aromatic regions in 2D HSQC NMR spectra of HEL and MHEL. (c) Partial side-chain regions and (d) aromatic regions in 2D HSQC NMR spectra of HDL and MHDL.

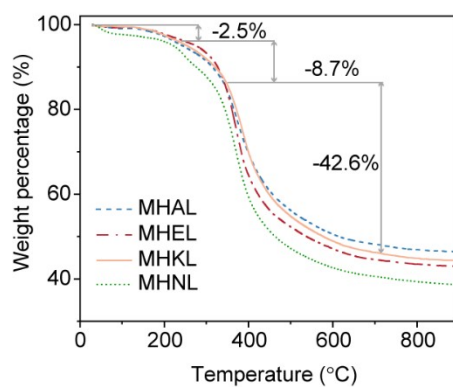

**Figure S5.** Thermogravimetric (TG) curves of various methylolated lignins.

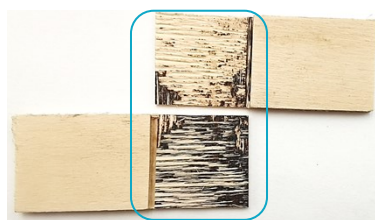

Wood failure

**Figure S6.** Wood failure of the three-layer plywood prepared with the MHKL adhesive after a wet strength test.

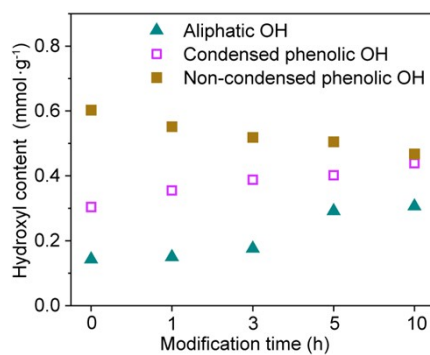

**Figure S7.** The effect of methylation time on hydroxyl contents of MHKLs.

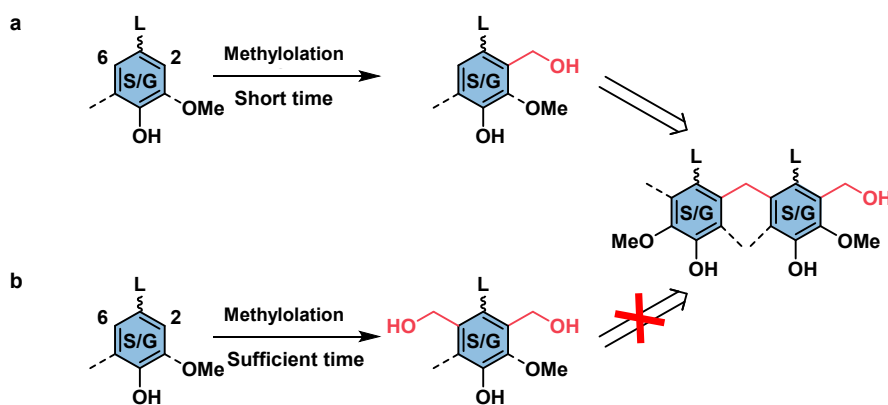

**Figure S8.** The effect of methylation on lignin crosslinking. (a) Short time methylation. (b) Sufficient time methylation.

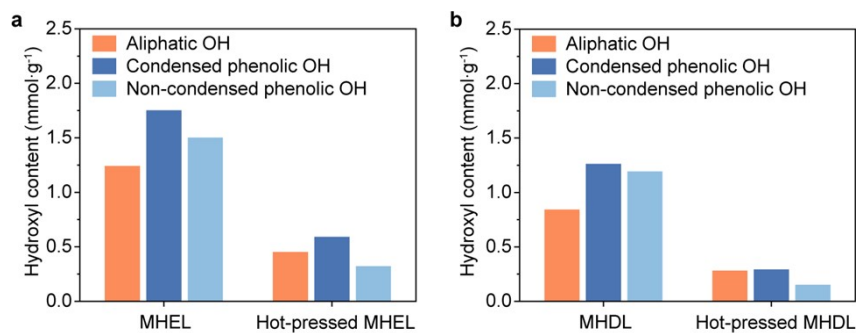

**Figure S9.** <sup>31</sup>P NMR characterization of lignin before/after hot-pressing. (a) Hydroxyl contents of MHEL before/after hot-pressing. (b) Hydroxyl contents of MHDL before/after hot-pressing.

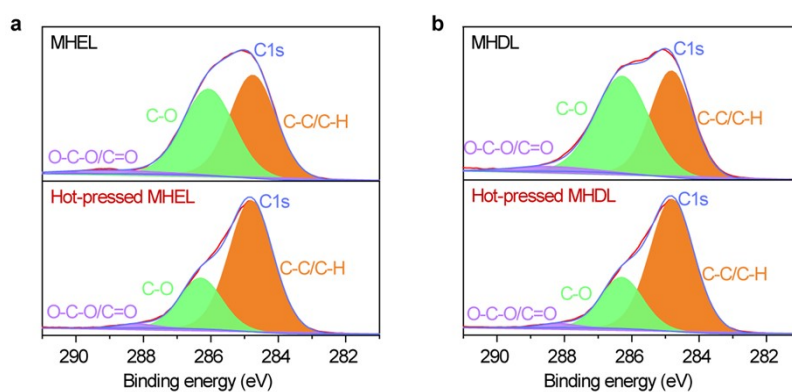

**Figure S10.** XPS characterization of lignin before/after hot-pressing. (a) C1s in XPS spectra of MHEL and hot-pressed MHEL. (b) C1s in XPS spectra of MHDL and hot-pressed MHDL.

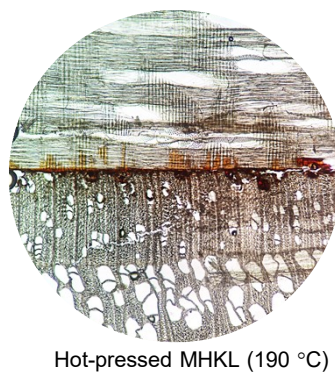

Hot-pressed MHKL (190 °C)

**Figure S11.** Optical microscopy images of the glue lines in the plywood products.

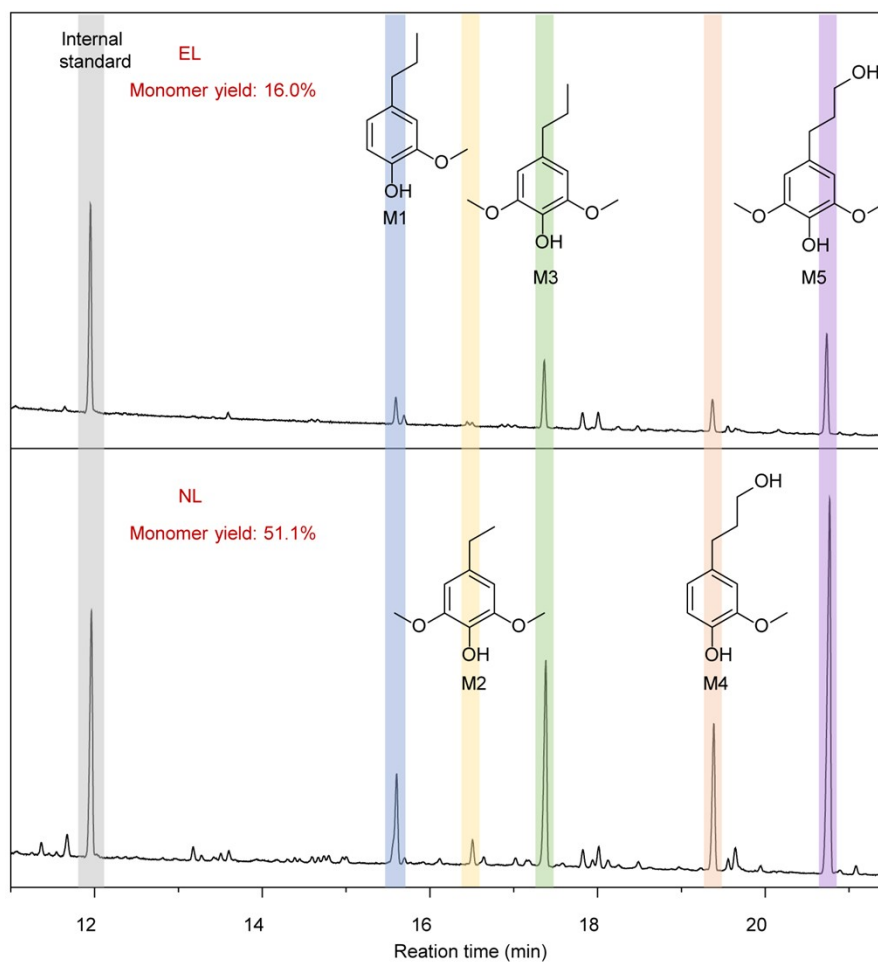

**Figure S12.** GC spectra of monomers from hydrogenolysis of lignin samples. (a) Ethanol lignin. (b) Native lignin in eucalyptus wood particles.

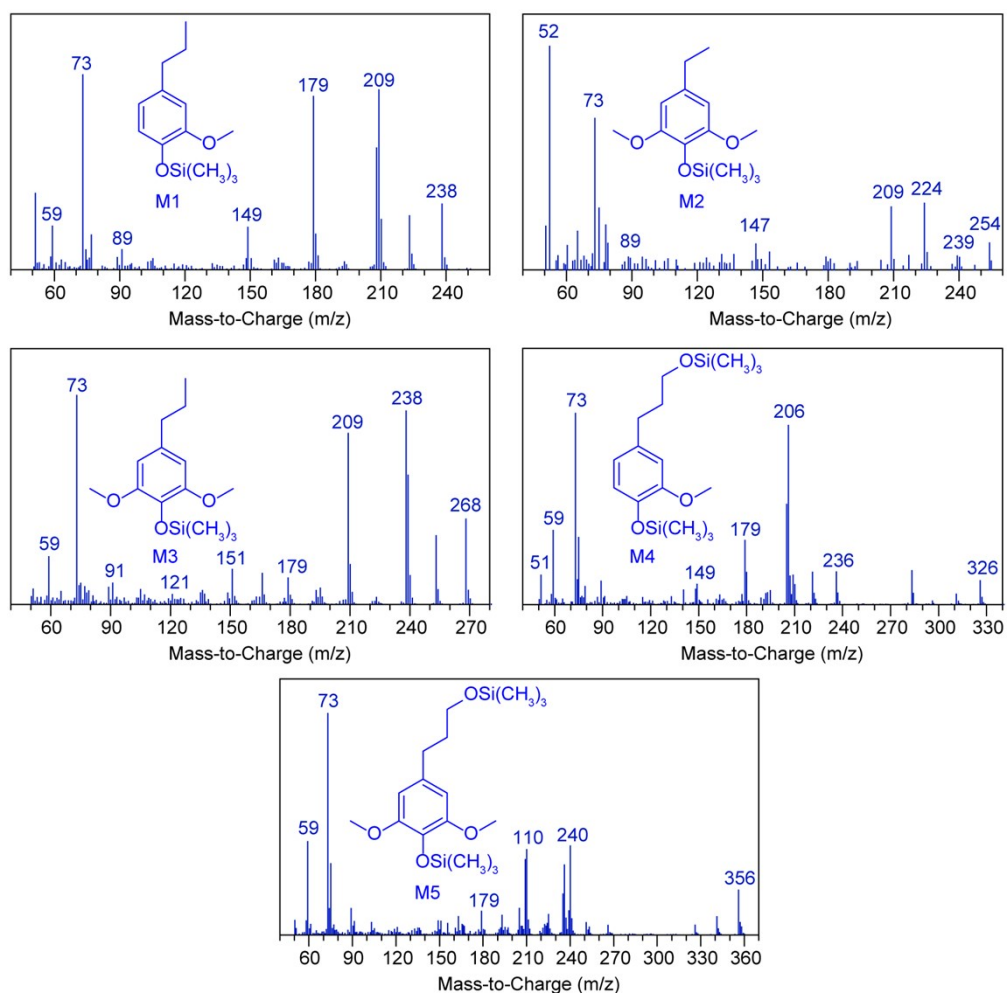

**Figure S13.** MS spectra of monomers from hydrodeoxygenation of lignin samples.

## References

- 1 X. Meng, C. Crestini, H. Ben, N. Hao, Y. Pu, A. J. Ragauskas and D. S. Argyropoulos, *Nat. Protoc.*, 2019, **14**, 2627–2647.
